# Supplementary material for: Rhoptry antigens as Toxoplasma gondii vaccine target
Source: PubMed Central journal article supplement — Clin Exp Vaccine Res. 2019 Jan 31;8(1):4–26. doi: 10.7774/cevr.2019.8.1.4 (PMC6369123; doi:10.7774/cevr.2019.8.1.4), 2019-01-31
Supplement: cevr-8-4-s003.pdf [file cevr-8-4-s003.pdf]

**Supplementary Table 3.** Baseline characteristics of included studies based on immunization experiments with protein vaccines against *T. gondii* in mouse models (single antigens)

| Antigen | Adjuvant or carrier | Ag delivery                                                   | Mouse strain                                            | Challenge                                                          | Immune responses                                                                                                                                                                                        | Brain cyst load                                                                                               | Survival                                                                                                                                                                      | Conclusions or suggestions                                                                                                                                                                                                                                                                                                                                                | Reference |
|---------|---------------------|---------------------------------------------------------------|---------------------------------------------------------|--------------------------------------------------------------------|---------------------------------------------------------------------------------------------------------------------------------------------------------------------------------------------------------|---------------------------------------------------------------------------------------------------------------|-------------------------------------------------------------------------------------------------------------------------------------------------------------------------------|---------------------------------------------------------------------------------------------------------------------------------------------------------------------------------------------------------------------------------------------------------------------------------------------------------------------------------------------------------------------------|-----------|
| ROP1    | FCA and FIA         | Protein (10 µg)+FCA for prime injection+FIA for boosters, s.c | BALB/c                                                  | 1 × 10 <sup>3</sup> Tachyzoites, RH strain, i.p                    | Induced humoral immune response<br>↑ SI (3.04±0.21, p<0.0001)<br>↑ IFN-γ (1.457 ± 31.19, p<0.0001) and IL-4 (186 ± 14.17, p<0.01)                                                                       | NR                                                                                                            | Increased survival rate (mean survival of 29 days, p<0.05)                                                                                                                    | These findings proposed that the ROP1 Ag is a potential candidate for the development of vaccine against toxoplasmosis. Complete protection may be achieved by combining ROP1 with other immunogenic rhoptry antigens.                                                                                                                                                    | [5]       |
| ROP2    | Alum                | Protein (10 µg), i.m                                          | C57BL/6 (H-2 <sup>b</sup> ) and C3H (H-2 <sup>k</sup> ) | 20 (sublethal dose) or 100 (lethal dose) ME49 tissue cysts, orally | -                                                                                                                                                                                                       | 20 (sublethal dose) ME49 tissue cysts, orally<br>C57BL/6: reduced (none significant)<br>C3H: reduced (p<0.01) | 100 (lethal dose) ME49 tissue cysts, orally<br>There were no significant differences in the survival rates from both strains of immunized mice compared to the control groups | The results reinforce the value of alum as a possible adjuvant to be used in immunization against <i>T. gondii</i> , allowing the development of a vaccine for wide application for either humans or animals. We consider that combinations with other effective antigens that generate immunity by different strategies should also be taken into account in the future. | [32]      |
|         | CpG-ODN             | Protein (10 µg)+CpG (10 µg), i.m                              | C3H/HeN (H-2 <sup>k</sup> )                             | 20 (sublethal dose) tissue cysts, Me49 (Type II) strain, orally    | Induced a strong humoral Th1-biased response<br>High IgG2a to IgG1 antibody ratio<br>↑ IFN-γ and IL-10                                                                                                  | Reduced (63%, p<0.001)                                                                                        | NR                                                                                                                                                                            | Our results indicate that CpG-ODN is an important candidate adjuvant for use in potential vaccines against this pathogen.                                                                                                                                                                                                                                                 | [33]      |
|         | Quil-A              | Protein (10 µg)+10 µg Quil-A, i.n                             | BALB/c                                                  | NR                                                                 | ↑ IgG (in 5/10 mice, 50%) and IgA (in 2/10 mice, 20%) antibodies in sera of mice at day 62 of the experiment<br>Elicited significant lymphocyte proliferation response                                  | NR                                                                                                            | NR                                                                                                                                                                            | These results indicate that intranasal immunization with recombinant protein ROP2 plus Quil-A can elicit both cellular and humoral immune responses in BALB/c mice.                                                                                                                                                                                                       | [34]      |
| ROP5    | FCA and FIA         | Protein (100 µg)+ FCA+2 boosters in FIA, s.c                  | BALB/c                                                  | 1 × 10 <sup>2</sup> Tachyzoites, RH strain, i.p                    | ↑ Level of IgG antibodies (p<0.01)<br>Induced mixed Th1/Th2 immune responses with the predominance of IgG2a over IgG1<br>↑ IFN-γ, IL-2, IL-4, and IL-10 (p<0.05)<br>↑ Splenocyte proliferation (p<0.05) | NR                                                                                                            | Prolonged survival time (p<0.05)                                                                                                                                              | This study demonstrated the novel finding that ROP5 induced a strong protective humoral and cellular response against <i>T. gondii</i> infection, which indicated that it is a potential vaccine candidate against toxoplasmosis.                                                                                                                                         | [35]      |

(Continued to the next page)

Supplementary Table 3. Continued

| Antigen                                                                                                               | Adjuvant or carrier                 | Ag delivery                                                              | Mouse strain              | Challenge                                                                                                              | Immune responses                                                                                                                                                                                                                                                                                                                                                                                                                                                                                                                                                                                                                         | Brain cyst load                                                                      | Survival                                                                                                    | Conclusions or suggestions                                                                                                                                                                                                                                                                                                                                                                         | Reference |
|-----------------------------------------------------------------------------------------------------------------------|-------------------------------------|--------------------------------------------------------------------------|---------------------------|------------------------------------------------------------------------------------------------------------------------|------------------------------------------------------------------------------------------------------------------------------------------------------------------------------------------------------------------------------------------------------------------------------------------------------------------------------------------------------------------------------------------------------------------------------------------------------------------------------------------------------------------------------------------------------------------------------------------------------------------------------------------|--------------------------------------------------------------------------------------|-------------------------------------------------------------------------------------------------------------|----------------------------------------------------------------------------------------------------------------------------------------------------------------------------------------------------------------------------------------------------------------------------------------------------------------------------------------------------------------------------------------------------|-----------|
| ROP17                                                                                                                 | -                                   | Proteins (15, 25, 35 or 45 µg of rTgROP17), i.n                          | BALB/c                    | 1 × 10 <sup>4</sup> and 4 × 10 <sup>4</sup> tachyzoites of RH strain for chronic and acute assay, respectively, orally | <ul style="list-style-type: none"> <li>↑ IgG antibody production of the mice immunized with 25, 35, and 45 µg rTgROP17 (p&lt;0.05)</li> <li>↑ IgG1 and IgG2a in the sera of all the mice immunized with rTgROP17, particularly in those immunized with 35 and 45 µg rTgROP17 (p&lt;0.05)</li> <li>Mixed Th1/Th2 immune response (predominance of IgG2a over IgG1)</li> <li>↑ Splenocyte proliferation (p&lt;0.01)</li> <li>↑ IFN-γ (p&lt;0.01), IL-2 (p 0.01), IL-4 (p&lt;0.05)</li> <li>↑ Mucosal immune responses (SIgA antibody titers) in the nasal, vaginal and intestinal washes of rTgROP17-immunized mice (p&lt;0.01)</li> </ul> | <ul style="list-style-type: none"> <li>↓ Liver and brain parasite burdens</li> </ul> | Increased survival rate 30 days post challenge (75% protection, p<0.01)                                     | The study suggests that intranasal immunization of mice with rTgROP17 can induce both systemic and local immune responses to provide protection against lethal <i>T. gondii</i> infection through reduction of the tachyzoite burdens in the host tissues and increases of the animal survivals. We conclude that ROP17 is a promising vaccine candidate against infection with <i>T. gondii</i> . | [36]      |
| ROP18 Groups: ROP18S2+ Montanide™ ISA 71 +poly I:C (s.c-M-P-ROP18), s.c ROP18S2+CT (i.n-CT-ROP18), i.n Control groups | Montanide ISA 71, poly (I:C) and CT | s.c and i.n                                                              | CBA/J (H-2 <sup>k</sup> ) | 60 Cysts of the 76 K strain, orally                                                                                    | <ul style="list-style-type: none"> <li>Significantly higher specific IgG antibody in s.c-M-P-ROP18 group, compared with i.n-CT-ROP18 group</li> <li>↑ Specific IgG antibody, compared to controls (especially in the s.c-M-P-ROP18 group)</li> <li>The predominance of IgG1 over the IgG2a</li> <li>↑ Intestinal IgA response</li> <li>↑ IFN-γ, IL-2, and IL-5 responses in immunized mice compared to the control groups (p&lt;0.05)</li> <li>Mixed Th1/Th2 immune response with the predominance of Th1</li> <li>Similar percentage of CD8<sup>+</sup> T cells between vaccinated and control groups (p&gt;0.05)</li> </ul>            | Reduced for i.n-CT-ROP18 group (50%, p<0.001)                                        | NR                                                                                                          | These results suggest that ROP18 could be a component of a subunit vaccine against toxoplasmosis and that strategies designed to enhance mucosal protective immune responses could lead to more encouraging results.                                                                                                                                                                               | [18]      |
| ROP18                                                                                                                 | Re                                  | Proteins (100 µg rROP18)+different dosages of Re (10, 50 or 100 µg), s.c | ICR                       | 5 × 10 <sup>2</sup> Tachyzoites, RH strain, i.p                                                                        | <ul style="list-style-type: none"> <li>↑ IgG antibody than control (p&lt;0.05).</li> <li>Co-administration of rROP18 with Re (50 µg and 100 µg) induced numerically higher specific antibody level than that with 10 µg Re (p&lt;0.05)</li> <li>Mixed IgG1/IgG2a response, with the predominance of IgG1 production</li> <li>↑ Splenocyte proliferation in mice immunized with rROP18+Re (50 µg and 100 µg, p&lt;0.05)</li> <li>↑ IFN-γ and IL-4 (p&lt;0.05)</li> </ul>                                                                                                                                                                  | NR                                                                                   | Increased survival time (15 days in mice immunized with rROP18+Re, compared with 6 days in control, p<0.05) | The data demonstrate that by the addition of ginsenoside Re, the rROP18 triggered a stronger humoral and cellular response against <i>T. gondii</i> , and that Re is a promising vaccine adjuvant against toxoplasmosis, deserves further evaluation and development.                                                                                                                              | [37]      |

(Continued to the next page)

Supplementary Table 3. Continued

| Antigen                          | Adjuvant or carrier | Ag delivery                         | Mouse strain       | Challenge | Immune responses                                                                                               | Brain cyst load | Survival | Conclusions or suggestions                                                                                                                                                                                                                                    | Reference |
|----------------------------------|---------------------|-------------------------------------|--------------------|-----------|----------------------------------------------------------------------------------------------------------------|-----------------|----------|---------------------------------------------------------------------------------------------------------------------------------------------------------------------------------------------------------------------------------------------------------------|-----------|
| ROP18                            | Montanide and PLGA  | Proteins (10 µg)+ PLGA, i.p and i.n | Swiss-Webster mice | NR        | Significantly higher levels of IgG in mice immunized with rROP18-adjuvant, compared with rROP18 group (p<0.05) | NR              | NR       | It was concluded that nanospheres of ROP18 would be a non-invasive approach to develop vaccines against <i>T. gondii</i> . Further experiments are needed to determine the cellular response to these nanospheres in a mouse model for chronic toxoplasmosis. | [38]      |
| G1. Montanide adjuvant only, i.p |                     |                                     |                    |           | Significantly higher levels of IgG in mice immunized with rROP18-PLGA, compared with PLGA group (p<0.05)       |                 |          |                                                                                                                                                                                                                                                               |           |
| G2. 10 µg rROP18, i.p            |                     |                                     |                    |           | IgA levels in rROP18-PLGA were significant (p<0.05) as compared to PLGA                                        |                 |          |                                                                                                                                                                                                                                                               |           |
| G3. 10 µg rROP18+ Montanide, i.p |                     |                                     |                    |           | The predominance of IgG2a over IgG1 in mice vaccinated with rROP18-PLGA (p<0.05)                               |                 |          |                                                                                                                                                                                                                                                               |           |
| G4. PLGA only, i.n               |                     |                                     |                    |           | The predominance of IgG1 over IgG2a in mice vaccinated with rROP18-adjuvant (p<0.05)                           |                 |          |                                                                                                                                                                                                                                                               |           |
| G5. rROP18-PLGA, i.n             |                     |                                     |                    |           |                                                                                                                |                 |          |                                                                                                                                                                                                                                                               |           |

↑, increase; Ag, antigen; CpG ODN, oligodeoxynucleotides contained CG motifs; CT, cholera toxin; FCA, Freund's complete adjuvant; FIA, Freund's incomplete adjuvant; i.m, intramuscular; i.n, intranasal; i.p, intraperitoneally; IFN-γ, interferon-γ; IL, interleukin; NR, not reported; PLGA, polylactide-co-glycolide acid; poly (I:C), polyinosinic-polycytidylic acid; Re, Ginsenoside Re; ROP, rhoptry protein or rhoptry antigens; s.c, subcutaneous; SI, stimulation index; SlgA, secretory immunoglobulin A; *T. gondii*, *Toxoplasma gondii*; Th, T helper.
