# Supplementary material for: Rhoptry antigens as Toxoplasma gondii vaccine target
Source: PubMed Central journal article supplement — Clin Exp Vaccine Res. 2019 Jan 31;8(1):4–26. doi: 10.7774/cevr.2019.8.1.4 (PMC6369123; doi:10.7774/cevr.2019.8.1.4), 2019-01-31
Supplement: cevr-8-4-s005.pdf [file cevr-8-4-s005.pdf]

**Supplementary Table 5.** Examples of immunization experiments with epitope-based vaccines against *T. gondii* in mouse models

| Antigen                                                                                                                                                                                                                                       | Adjuvant or carrier                | Ag delivery  | Mouse strain | Challenge                                           | Immune responses                                                                                                                                                                                                                                                                                                                                                                                                                                                                                                                                                                                                                                                                                                                                                                                                                | Brain cyst load | Survival                                                                                                                                                                                                                                                         | Conclusions or suggestions                                                                                                                                                                                                                                                                                                                                                                                                       | Reference |
|-----------------------------------------------------------------------------------------------------------------------------------------------------------------------------------------------------------------------------------------------|------------------------------------|--------------|--------------|-----------------------------------------------------|---------------------------------------------------------------------------------------------------------------------------------------------------------------------------------------------------------------------------------------------------------------------------------------------------------------------------------------------------------------------------------------------------------------------------------------------------------------------------------------------------------------------------------------------------------------------------------------------------------------------------------------------------------------------------------------------------------------------------------------------------------------------------------------------------------------------------------|-----------------|------------------------------------------------------------------------------------------------------------------------------------------------------------------------------------------------------------------------------------------------------------------|----------------------------------------------------------------------------------------------------------------------------------------------------------------------------------------------------------------------------------------------------------------------------------------------------------------------------------------------------------------------------------------------------------------------------------|-----------|
| MEG, containing T- and B-cell epitopes SAG1 (59-67), P1 SAG1 (246-256), P2 GRA1 (176-186), P3 ROP2 (199-216), P4 GRA4 (235-245), P5 Groups:                                                                                                   | CpG motif and CTXA <sub>7</sub> /B | Plasmid, i.m | BALB/c       | 1 × 10 <sup>3</sup> Tachyzoites, i.p RH strain, i.p | ↑ Antibody response (IgG) in the mice immunized with pVAX1-MEG (p= 0.009) and pVAX1-MEG-CTXA <sub>7</sub> /B (p=0.006) group, compared than negative controls<br>↑ Serum IgA response in the mice immunized with pVAX1-MEG-CTXA <sub>7</sub> /B (p<0.05, compared to other immunized group)<br>The predominances of the levels of IgG2a over IgG1 (especially in mice immunized with pVAX1-MEG-CTXA <sub>7</sub> /B)<br>Higher IgG2a values in mice immunized with pVAX1-MEG-CTXA <sub>7</sub> /B, compared with pVAX1-MEG (p<0.001) and similar values of IgG1 between these groups (p=0.834)<br>↑ Splenocyte proliferation significantly (especially in mice immunized with pVAX1-MEG-CTXA <sub>7</sub> /B)<br>↑ CTL activity (especially in mice immunized with pVAX1-MEG-CTXA <sub>7</sub> /B)<br>↑ IFN-γ and IL-2 (p<0.05) | NR              | Increased survival time (p<0.05 and p<0.001) in mice immunized with pVAX1-MEG and pVAX1-MEG-CTXA2/B, respectively, compared with three control groups<br>20% Survival in mice immunized with pVAX1-MEG-CTXA2/B<br>All mice in control groups died within 7 days. | This study is the first report of a multi-epitope DNA construct strategy as a potential DNA vaccine against toxoplasmosis. Furthermore, we have also demonstrated that the use of a combination of this DNA vaccine component with CpG motif and CTXA <sub>7</sub> /B as genetic adjuvant enhanced both the magnitude and breadth of immune responses accompanied by significant increasing of survival rate in vaccinated mice. | [47]      |
| MEG, containing T- and B-cell epitopes SAG1 (40-50 aa) – (236-247 aa) – (181-192 aa) GRA2 (153-169 aa) – (113-125 aa) GRA7 (162-175 aa) – (221-235 aa) – (153–162 aa) ROP16 (240-253 aa) – (364-372 aa) – (470-483 aa) – (541-549 aa) Groups: | pRANTES                            | Plasmid, i.m | BALB/c       | 1 × 10 <sup>3</sup> Tachyzoites, i.p RH strain, i.p | ↑ Levels of IgG in mice vaccinated with pTgMEG and pTgMEG+pRANTES (especially in the latter group), compared with controls (p<0.05)<br>The predominance of IgG2a over IgG1 (especially in the pTgMEG+pRANTES group) significantly<br>↑ IFN-γ in the experimental groups, compared with the control groups (p<0.05)<br>Higher IFN-γ secretion in immunized mice with pTgMEG+pRANTES compared with pTgMEG group (p<0.05)<br>IL-4 or IL-10 production did not differ among all groups.<br>↑ Percentages of CD4 <sup>+</sup> and CD8 <sup>+</sup> T cells in pTgMEG and pTgMEG+pRANTES (especially in latter group)                                                                                                                                                                                                                 | NR              | Increased survival time (p<0.05) pTgMEG; 13 days pTgMEG+pRANTES: 17 days<br>All control mice died within 6-7 days.                                                                                                                                               | The DNA vaccine and the genetic adjuvant revealed in this study might be new candidates for further vaccine development against <i>T. gondii</i> infection, although developing an effective vaccine against <i>T. gondii</i> is not only a tedious mission but, also adifficult a challenge.                                                                                                                                    | [48]      |

↑, increase; Ag, antigen; CTLs, cytotoxic T lymphocytes; CTXA<sub>7</sub>/B, A<sub>7</sub>/B subunits of cholera toxin; GRA, dense granule antigens; i.m, intramuscular; i.p, intraperitoneally; IFN-γ, interferon-γ; IL, interleukin; MEG, multi-epitope genes; NR, not reported; PBS, phosphate-buffered saline; RANTES, regulated upon activation normal T-cell expressed and secreted; ROP, rhostry protein or rhostry antigens; SAG, surface antigens; *T. gondii*, *Toxoplasma gondii*.
