# Supplementary material for: Rhoptry antigens as Toxoplasma gondii vaccine target
Source: PubMed Central journal article supplement — Clin Exp Vaccine Res. 2019 Jan 31;8(1):4–26. doi: 10.7774/cevr.2019.8.1.4 (PMC6369123; doi:10.7774/cevr.2019.8.1.4), 2019-01-31
Supplement: cevr-8-4-s006.pdf [file cevr-8-4-s006.pdf]

**Supplementary Table 6.** Examples of immunization with live-attenuated vectors expressing *T. gondii* antigens in mouse models

| Antigen                                                                                                                                                                                           | Adjuvant/<br>Carrier                                                                                                   | Ag delivery      | Mouse strain            | Challenge                                                                                                   | Immune responses                                                                                                                                                                                                                                                                                                                                                                                                                                                                                                                                                                                                                                                                                                                                                                                                                                                                                                                                                                                                                                                                                                                                                                                                                                                                                                                                                                                    | Brain cyst load                                                                                              | Survival                                                                                                                                                                                                                                                                                                                                                                                                                                                                                                                                                          | Conclusions or suggestions                                                                                                                                                                                                                          | Reference |
|---------------------------------------------------------------------------------------------------------------------------------------------------------------------------------------------------|------------------------------------------------------------------------------------------------------------------------|------------------|-------------------------|-------------------------------------------------------------------------------------------------------------|-----------------------------------------------------------------------------------------------------------------------------------------------------------------------------------------------------------------------------------------------------------------------------------------------------------------------------------------------------------------------------------------------------------------------------------------------------------------------------------------------------------------------------------------------------------------------------------------------------------------------------------------------------------------------------------------------------------------------------------------------------------------------------------------------------------------------------------------------------------------------------------------------------------------------------------------------------------------------------------------------------------------------------------------------------------------------------------------------------------------------------------------------------------------------------------------------------------------------------------------------------------------------------------------------------------------------------------------------------------------------------------------------------|--------------------------------------------------------------------------------------------------------------|-------------------------------------------------------------------------------------------------------------------------------------------------------------------------------------------------------------------------------------------------------------------------------------------------------------------------------------------------------------------------------------------------------------------------------------------------------------------------------------------------------------------------------------------------------------------|-----------------------------------------------------------------------------------------------------------------------------------------------------------------------------------------------------------------------------------------------------|-----------|
| ROP2<br>Groups:<br>MVA and MVA+ROP2<br>viruses ( $10^6$ , $10^7$ ,<br>and $10^8$ pfu)<br>PBS                                                                                                      | None/MVA                                                                                                               | i.m              | Female<br>Swiss<br>mice | Acute: $3 \times 10^2$<br>tachyzoites, RH<br>strain, i.p<br>Chronic: 20 cysts of the<br>ME49 strain, orally | ↑ Specific IgG antibodies against the ROP2<br>protein<br>Mixed Th1/Th2 immune response<br>(predominance of IgG2a over IgG1)                                                                                                                                                                                                                                                                                                                                                                                                                                                                                                                                                                                                                                                                                                                                                                                                                                                                                                                                                                                                                                                                                                                                                                                                                                                                         | Animals injected<br>either with MVA,<br>MVA-ROP2 or PBS<br>showed the same<br>results (none-<br>significant) | Increased survival time<br>significantly (11 days<br>vs. 8-9 days, $p=0.04$ )                                                                                                                                                                                                                                                                                                                                                                                                                                                                                     | We conclude<br>that MVA ROP2<br>recombinant vaccinia<br>virus can possibly<br>generate an immune<br>response, which<br>could be useful in<br>protection against<br>toxoplasmosis.                                                                   | [49]      |
| ROP2<br>Groups:<br>BCG/pMV262-ROP2<br>BCG/pMV262<br>PBS                                                                                                                                           | None/M.<br>bovis/BCG                                                                                                   | s.c              | BALB/c                  | $5 \times 10^3$ Tachyzoites, RH<br>strain, i.p                                                              | ↑ Specific immune responses against ROP2<br>protein in mice immunized with BCG/pMV262-<br>ROP2<br>↑ IFN- $\gamma$ and IL-2 in both groups that received a<br>single inoculation and a boost inoculation of<br>BCG/pMV262-ROP2<br>↑ Percentages of CD4 <sup>+</sup> T ( $p<0.01$ ) and CD8 <sup>+</sup> cells<br>(non-significant)                                                                                                                                                                                                                                                                                                                                                                                                                                                                                                                                                                                                                                                                                                                                                                                                                                                                                                                                                                                                                                                                   | NR                                                                                                           | Increased survival rate<br>( $p<0.05$ ).<br>Control mice were<br>died within 8-9 days                                                                                                                                                                                                                                                                                                                                                                                                                                                                             | These results indicated<br>that <i>M. bovis</i> BCG is<br>an adequate vector<br>to express and<br>present antigens of <i>T.<br/>gondii</i> , and it may be<br>used to further study<br>the induction of<br>protective immunity<br>in other animals. | [50]      |
| MEG<br>SAG1 <sup>159-67</sup><br>SAG1-1 <sup>146-255</sup><br>GRA1 <sup>176-186</sup><br>ROP2 <sup>200-215</sup><br>GRA4 <sup>235-243</sup><br>SAG2C <sup>66-44</sup><br>SAG2X <sup>215-223</sup> | CTXA <sub>2</sub> /B/<br>S.<br>typhimurium<br>strain<br>BRD509<br>aroA <sup>-</sup> and<br>aroD <sup>-</sup><br>mutant | i.o, i.n and i.m | BALB/c                  | $1 \times 10^3$ Tachyzoites, RH<br>strain, i.p                                                              | Higher levels of IgG antibody in mice vaccinated<br>with pVAX1-MEG-CTXA <sub>2</sub> /B DNA plasmid via<br>i.m route, compared with mice immunized<br>with BRD509/pVAX1-MEG-CTXA <sub>2</sub> /B orally<br>and intranasally ( $p<0.05$ )<br>Higher levels of IgA antibody in mice immunized<br>with BRD509/pVAX1-MEG-CTXA <sub>2</sub> /B via i.o and<br>i.n routes, in comparison to mice immunized<br>intramuscularly with pVAX1-MEG-CTXA <sub>2</sub> /B<br>plasmid ( $p<0.05$ )<br>↑ Percentages of CD8 <sup>+</sup> T cells in the three<br>immunization routes, compared to the controls<br>(the highest percentages were seen in mice<br>vaccinated i.o with BRD509/pVAX1-MEG-<br>CTXA <sub>2</sub> /B)<br>↑ IFN- $\gamma$ and IL-2 in mice vaccinated with pVAX1-<br>MEG-CTXA <sub>2</sub> /B, compared with the control<br>groups ( $p<0.05$ )<br>Significantly higher secretion of IFN- $\gamma$ and IL-2<br>in the mice via i.n and i.o vaccinated with<br>BRD509/pVAX1-MEG-CTXA <sub>2</sub> /B, compared<br>with i.m vaccination route ( $p=0.02$ )<br>Similar values of IL-4 and IL-5 between<br>vaccinated groups and control groups ( $p>0.05$ )<br>Higher Ag specific lymphocyte proliferation<br>activity in BRD509/pVAX1-MEG-CTXA <sub>2</sub> /B i.n<br>and i.o immunization groups, compared with<br>i.m vaccination route with pVAX1-MEGCTXA <sub>2</sub> /<br>B ( $p<0.05$ ) | NR                                                                                                           | Increased survival rate<br>i.m: 20% survival<br>rate 10 days after<br>challenge (pVAX1-<br>MEG-CTXA <sub>2</sub> /B)<br>Control mice were<br>died within 4-5 days<br>(saline and pVAX1)<br>i.n: 40% survival<br>rate 10 days after<br>challenge (BRD509/<br>pVAX1-MEG-CTXA <sub>2</sub> /<br>B)<br>Control mice were<br>died within 5-7<br>days (BRD509 and<br>BRD509/pVAX1)<br>i.o: 60% survival<br>rate 10 days after<br>challenge (BRD509/<br>pVAX1-MEG-CTXA <sub>2</sub> /<br>B)<br>Control mice were<br>died within 4-8<br>days (BRD509 and<br>BRD509/pVAX1) | The results from this<br>study indicate that<br>a DNA vaccine<br>encoding multi-<br>epitopes of <i>T.<br/>gondii</i> delivered<br>by attenuated<br><i>Salmonella</i> is<br>promising.                                                               | [51]      |

(Continued to the next page)

Supplementary Table 6. Continued

| Antigen                                                          | Adjuvant/<br>Carrier | Ag delivery | Mouse strain | Challenge                                                                                                                             | Immune responses                                                                                                                                                                                                                                                                                                                                                                                                                                                                                                                                                                                                                                                                                                                  | Brain cyst load         | Survival                                                                                                               | Conclusions or suggestions                                                                                                                                                                                                                                                                                                                             | Reference |
|------------------------------------------------------------------|----------------------|-------------|--------------|---------------------------------------------------------------------------------------------------------------------------------------|-----------------------------------------------------------------------------------------------------------------------------------------------------------------------------------------------------------------------------------------------------------------------------------------------------------------------------------------------------------------------------------------------------------------------------------------------------------------------------------------------------------------------------------------------------------------------------------------------------------------------------------------------------------------------------------------------------------------------------------|-------------------------|------------------------------------------------------------------------------------------------------------------------|--------------------------------------------------------------------------------------------------------------------------------------------------------------------------------------------------------------------------------------------------------------------------------------------------------------------------------------------------------|-----------|
| ROP16<br>Groups:<br>CAV-2-ROP16<br>CAV-2<br>PBS<br>Blank control | None/CAV-2           | i.m         | BALB/c       | 1 × 10 <sup>3</sup> Tachyzoites, RH strain, i.p                                                                                       | Induced a strong IgG antibody response in the recombinant virus CAV-2-ROP16 group, compared to other groups (p<0.05)<br>↑ Levels of a mixed IgG1 and IgG2a (p<0.05) with the predominance of IgG2a production<br>Predominant Th1-type response had developed<br>↑ IFN-γ (791.13 ± 42.76 pg/mL, p<0.05), IL-2 (418.94 ± 34.43 pg/mL, p<0.05), and IL-4 (173.27 ± 18.93 pg/mL, p<0.05)<br>↑ IFN-γ and TNF-α production induced by CD4 <sup>+</sup> and CD8 <sup>+</sup> T cells (p<0.05)<br>↑ Splenocyte proliferation in mice immunized with CAV-2-ROP16<br>↑ Percentages of CD4 <sup>+</sup> T and CD8 <sup>+</sup> cells in CAV-2-ROP16 immunized group                                                                          | NR                      | Increased survival rate (25% protection until 80 days after challenge, p<0.05)<br>Control mice were died within 7 days | This study presents the successful use of recombinant virus CAV-2-ROP16 in vaccination protocols to protect against i.p challenge with the virulent RH strain of <i>T. gondii</i> . This system was shown to be extremely efficient in eliciting humoral and cellular immune responses that led to a significant improvement in survival time in mice. | [52]      |
| ROP18<br>Groups:<br>CAV-2-ROP18<br>CAV-2<br>PBS<br>Blank control | None/CAV-2           | i.m         | Kumming      | Acute: 1 × 10 <sup>3</sup> tachyzoites, RH strain (genotype I), i.p<br>Chronic: 5 cysts PRU strain (genotype II), i.g via oral gavage | Induced a strong IgG antibody response in the recombinant virus CAV-2-ROP18 group, compared to other groups (p<0.05)<br>↑ Levels of a mixed IgG1 and IgG2a (p<0.05) with the predominance of IgG2a production<br>↑ Splenocyte proliferation in mice immunized with CAV-2-ROP18 (approximately ~21-fold higher than other groups, p<0.05)<br>↑ CTL activity in mice immunized with CAV-2-ROP18 (p<0.05)<br>↑ Percentages of CD4 <sup>+</sup> T and CD8 <sup>+</sup> cells in CAV-2-ROP18 immunized group<br>↑ IFN-γ (914.26 ± 36.56 pg/mL, p<0.05), IL-2 (431.07 ± 28.94 pg/mL, p<0.05), and IL-4 (197.29 ± 29.98 pg/mL, p<0.05)<br>↑ IFN-γ and TNF-α production in both CD4 <sup>+</sup> and CD8 <sup>+</sup> T cell compartments | Reduced (57.3%, p<0.05) | Increased survival rate (40% protection until 60 days after challenge, p<0.05)<br>Control mice were died within 7 days | These results demonstrate the potential use of a CAV vector harboring the ROP18 gene in the development of a vaccine against acute and chronic toxoplasmosis.                                                                                                                                                                                          | [53]      |

(Continued to the next page)

Supplementary Table 6. Continued

| Antigen                                                                                                                                                                                                          | Adjuvant/<br>Carrier | Ag delivery                                                                                                                                                                                                                                                                | Mouse strain | Challenge                                                                                                                              | Immune responses                                                                                                                                                                                                                                                                                                                                                                                                                                                                                                                                                                                                                                                                                                                                                                                                                                                                                                   | Brain cyst load                                                                                                                                                    | Survival                                                                                                                                                           | Conclusions or suggestions                                                                                                                                                                                                                                                                                                     | Reference |
|------------------------------------------------------------------------------------------------------------------------------------------------------------------------------------------------------------------|----------------------|----------------------------------------------------------------------------------------------------------------------------------------------------------------------------------------------------------------------------------------------------------------------------|--------------|----------------------------------------------------------------------------------------------------------------------------------------|--------------------------------------------------------------------------------------------------------------------------------------------------------------------------------------------------------------------------------------------------------------------------------------------------------------------------------------------------------------------------------------------------------------------------------------------------------------------------------------------------------------------------------------------------------------------------------------------------------------------------------------------------------------------------------------------------------------------------------------------------------------------------------------------------------------------------------------------------------------------------------------------------------------------|--------------------------------------------------------------------------------------------------------------------------------------------------------------------|--------------------------------------------------------------------------------------------------------------------------------------------------------------------|--------------------------------------------------------------------------------------------------------------------------------------------------------------------------------------------------------------------------------------------------------------------------------------------------------------------------------|-----------|
| Encoding MAS and UIMAS<br>ROP18 <sup>347-386</sup> , SAG3 <sup>101-144</sup> , MIC6 <sup>288-347</sup> , GRA7 <sup>182-224</sup> , MAG1 <sup>158-125</sup> , BAG1 <sup>158-211</sup> , and SPA <sup>42-200</sup> | Ubiquitin/Ad         | DNA vaccines (p-MAS or p-UIMAS plasmid, 100 µg each), i.m or recombinantAd vaccine (Ad-UIMAS virus, 3 × 10 <sup>8</sup> PFU each), i.m or the combination of DNA vaccine (p-UIMAS, 100 µg each) and recombinant Ad vaccine (Ad-UIMAS virus, 3 × 10 <sup>8</sup> PFU each). | BALB/c       | Acute: 1 × 10 <sup>8</sup> tachyzoites, RH strain (genotype I), i.p<br>Chronic: 20 cysts PRU strain (genotype II), i.g via oral gavage | Induced a strong IgG antibody response in both p-MAS and p-UIMAS immunized mice (especially in the p-UIMAS group), compared to control groups<br>↑ Splenocyte proliferation in both p-MAS and p-UIMAS immunized mice (a further 30% increase in latter group)<br>↑ IFN-γ and IL-2 secretion in both p-MAS and p-UIMAS immunized mice (especially in the p-UIMAS group), compared to control groups<br>↑ Levels of an IgG1 and IgG2a in p-MAS and p-UIMAS immunized mice (predominance of IgG2a over IgG1), compared to control groups<br>↑ Percentages of CD4 <sup>+</sup> T and CD8 <sup>+</sup> cells in p-MAS and p-UIMAS groups<br>Significantly higher levels of IFN-γ and IL-2 secretion and increased splenocyte proliferation in Ad-UIMAS immunized mice compared with p-UIMAS group (p<0.05)<br>↑ Percentages of CD8 <sup>+</sup> T cells in immunized with Ad-UIMAS compared with p-UIMAS group (p<0.05) | Reduced (p<0.01)<br>The brain cyst burden was 50% lower in p-MAS group (833 ± 116), compared with the control groups<br>p-UIMAS (570 ± 98)<br>Ad-UIMAS (469 ± 103) | Increased survival rate<br>p-MAS: 33% survival 28 days after challenge<br>p-UIMAS: 50% survival 28 days after challenge<br>Control mice were died within 8-10 days | Distinct humoral and cellular immunity induced by immunization with DNA vaccine and recombinant Ad vaccine encoding ubiquitin conjugated multistage Ag of <i>T. gondii</i> . The DNA vaccine had the advantage of inducing a stronger humoral response, whereas the Ad-vectored vaccine improved the cellular immune response. | [54]      |

(Continued to the next page)

Supplementary Table 6. Continued

| Antigen                                                                                                                                                                                                                   | Adjuvant/<br>Carrier | Ag delivery                | Mouse strain | Challenge                                                                                                                              | Immune responses                                                                                                                                                                                                                                                                                                                                                                                                                                                                                                                                                                                                                                                                                                                                                                                                                                                                                                                                                                                                                                                                                                                                                                                                                                                                                                                                              | Brain cyst load  | Survival                                                                                                                                                                                                                                              | Conclusions or suggestions                                                                                                        | Reference |
|---------------------------------------------------------------------------------------------------------------------------------------------------------------------------------------------------------------------------|----------------------|----------------------------|--------------|----------------------------------------------------------------------------------------------------------------------------------------|---------------------------------------------------------------------------------------------------------------------------------------------------------------------------------------------------------------------------------------------------------------------------------------------------------------------------------------------------------------------------------------------------------------------------------------------------------------------------------------------------------------------------------------------------------------------------------------------------------------------------------------------------------------------------------------------------------------------------------------------------------------------------------------------------------------------------------------------------------------------------------------------------------------------------------------------------------------------------------------------------------------------------------------------------------------------------------------------------------------------------------------------------------------------------------------------------------------------------------------------------------------------------------------------------------------------------------------------------------------|------------------|-------------------------------------------------------------------------------------------------------------------------------------------------------------------------------------------------------------------------------------------------------|-----------------------------------------------------------------------------------------------------------------------------------|-----------|
| ROP18<br>Encoding Ad-UMAS<br>ROP18 <sup>347-386</sup> , SAG3 <sup>101-144</sup> , MIC6 <sup>288-347</sup> ,<br>GRA7 <sup>182-224</sup> , MAG1 <sup>158-125</sup> , BAG1 <sup>158-211</sup> , and<br>SPA <sup>42-200</sup> | Ubiquitin/<br>Ad     | i.m, i.n, s.c, i.o,<br>i.v | BALB/c       | Acute: $1 \times 10^3$<br>tachyzoites, RH<br>strain (type I), i.p<br>Chronic: 20 cysts PRU<br>strain (type II), i.g via<br>oral gavage | ↑ Levels of <i>T. gondii</i> -specific IgG antibodies in the five Ad-UMAS immunization routes, compared to the controls (p<0.05)<br>Highest titer of IgG antibody was observed by i.m route and followed by s.c, i.n, i.o and i.v<br>↑ IgG subtypes in the five Ad-UMAS immunization routes, compared to the controls (p<0.05)<br>Significantly higher values of IgG2a in i.m and s.c vaccination groups, compared with other vaccination routes<br>Significantly higher values of IgA in i.n and i.o vaccination groups, compared with other vaccination routes<br>↑ Percentages of CD4 <sup>+</sup> and CD8 <sup>+</sup> T cells in the five Ad-UMAS immunization routes, compared to the controls (p<0.05)<br>Significantly higher percentages of CD4 <sup>+</sup> and CD8 <sup>+</sup> T cells in i.n and i.o vaccination groups, compared with other vaccination routes<br>↑ IFN-γ and IL-2 in the five Ad-UMAS immunization routes, compared to the controls (p<0.05)<br>Significantly higher secretion of IFN-γ and IL-2 in i.n and i.o vaccination groups, compared with other vaccination routes<br>↑ Lymphocyte proliferation ability in the five Ad-UMAS immunization routes, compared to the controls (p<0.05)<br>Significantly higher lymphocyte proliferation ability in i.n and i.o vaccination groups, compared with other vaccination routes | Reduced (p<0.05) | Increased survival rate<br>i.m, i.o, and i.n<br>vaccinated groups:<br>50% survival rate 28<br>days after challenge<br>i.v and s.c vaccinated<br>groups: 40% survival<br>rate 28 days after<br>challenge<br>All the control mice<br>died within 8 days | Ad-UMAS could be an effective and safe mucosal candidate vaccine to protect animals and humans against <i>T. gondii</i> infection | [55]      |

↑, increase; Ad-UMAS, adenovirus expressing ubiquitin-conjugated multistage antigen segments; Ad, adenovirus; Ag, antigen; BCG, Bacillus Calmette-Guerin; CAV-2, canine adenovirus type-2; CTLs, cytotoxic T lymphocytes; CTXA<sub>2</sub>/B, A<sub>2</sub>/B subunits of cholera toxin; GRA, dense granule antigens; i.g, intragastrically; i.m, intramuscular; i.n, intranasal; i.o, intraoral; i.p, intraperitoneally; i.v, intravenously; IFN-γ, interferon-γ; IL, interleukin; *M. bovis*, *Mycobacterium bovis*; MAS, multi-stage antigen segments; MEG, multi-epitope genes; MIC, microneme antigens or microneme proteins; MVA, modified vaccinia virus Ankara; NR, not reported; PBS, phosphate-buffered saline; PFU, plaque-forming unit; ROP, rhostry protein or rhostry antigens; s.c, subcutaneous; *S. typhimurium*, *Salmonella typhimurium*; SAG, surface antigens; *T. gondii*, *Toxoplasma gondii*; Th, T helper; TNF-α, tumor necrosis factor α; UMAS, ubiquitin-conjugated multistage antigen segments.
