# Supplementary material for: Rhoptry antigens as Toxoplasma gondii vaccine target
Source: PubMed Central journal article supplement — Clin Exp Vaccine Res. 2019 Jan 31;8(1):4–26. doi: 10.7774/cevr.2019.8.1.4 (PMC6369123; doi:10.7774/cevr.2019.8.1.4), 2019-01-31
Supplement: cevr-8-4-s007.pdf [file cevr-8-4-s007.pdf]

**Supplementary Table 7.** Examples of heterologous prime-boost immunization against *T. gondii* in mouse models

| Antigen/Adjuvant                                                                                                                                                                                                                                                                                                                                                                              | Ag delivery                                                                                                                                | Mouse strain | Challenge                                                                                                                              | Immune responses                                                                                                                                                                                                                                                                                                                                                                                                                                                                                                                                                    | Brain cyst load                                                                                                          | Survival                                                                                                                                                          | Conclusions or suggestions                                                                                                                                                                                                                                                                | Reference |
|-----------------------------------------------------------------------------------------------------------------------------------------------------------------------------------------------------------------------------------------------------------------------------------------------------------------------------------------------------------------------------------------------|--------------------------------------------------------------------------------------------------------------------------------------------|--------------|----------------------------------------------------------------------------------------------------------------------------------------|---------------------------------------------------------------------------------------------------------------------------------------------------------------------------------------------------------------------------------------------------------------------------------------------------------------------------------------------------------------------------------------------------------------------------------------------------------------------------------------------------------------------------------------------------------------------|--------------------------------------------------------------------------------------------------------------------------|-------------------------------------------------------------------------------------------------------------------------------------------------------------------|-------------------------------------------------------------------------------------------------------------------------------------------------------------------------------------------------------------------------------------------------------------------------------------------|-----------|
| rROP2-SAG1/FCA<br>pcROP2-SAG1<br>pcROP2-SAG1 boost<br>rROP2-SAG1/FIA                                                                                                                                                                                                                                                                                                                          | s.c<br>i.m                                                                                                                                 | BALB/c       | NR                                                                                                                                     | ↑ IgG antibody (especially in mice immunized with rROP2-SAG1 compared with pcROP2-SAG1 and pcROP2-SAG1+rROP2-SAG1 groups after 70 days of the first immunization, p<0.05)<br>Predominance of IgG1 over IgG2a (significant for mice immunized with rROP2-SAG1 and pcROP2-SAG1+rROP2-SAG1 groups, p<0.05)<br>More vigorous specific lymphoproliferative responses in mice of group rROP2-SAG1<br>↑ IFN-γ in groups rROP2-SAG1, or pcROP2-SAG1, or pcROP2-SAG1 boosted with rROP2-SAG1 (non-significant between these groups)                                          | NR                                                                                                                       | NR                                                                                                                                                                | The results indicate that fusion proteins ROP2-SAG1 exhibit immunogenicity by three immunization procedures, using a recombinant protein vaccine, or DNA vaccine, or DNA boosted with protein. Immune effects based on the recombinant protein are stronger than that of the DNA vaccine. | [56]      |
| ROP18<br>Encoding MAS and UMAS<br>ROP18 <sub>297-386</sub> , SAG3 <sub>101-144</sub> , MIC6 <sub>288-347</sub> , GRA7 <sub>182-224</sub> , MAG1 <sub>158-125</sub> , BAG1 <sub>158-211</sub> , and SPA <sub>42-200</sub><br>DNA vaccine or/and adenovirus vaccine<br>Prime/bopst.<br>DNA/DNA (p-UMAS/p-UMAS)<br>Ad/Ad (Ad-UMAS/Ad-UMAS)<br>DNA/Ad (p-UMAS/Ad-UMAS)<br>Ad/DNA (Ad-UMAS/p-UMAS) | The combination of DNA vaccine (p-UMAS, 100 µg each) and recombinant adenovirus vaccine (Ad-UMAS virus, 3 × 10 <sup>8</sup> PFU each), i.m | BALB/c       | Acute: 1 × 10 <sup>3</sup> tachyzoites, RH strain (genotype I), i.p<br>Chronic: 20 cysts PRU strain (genotype II), i.g via oral gavage | Highest levels of humoral antibodies and cellular immune responses were achieved in mice immunization priming with the DNA vaccine and boosting with the Ad-UMAS vaccine<br>Compared with p-UMAS or Ad-UMAS immunization alone, higher levels of a specific IgG (predominance of IgG2a) and higher levels of cytokines (IFN-γ and IL-2) were obtained by priming with p-UMAS and boosting with Ad-UMAS (p<0.05)<br>Priming with p-UMAS and boosting with Ad-UMAS demonstrated higher proliferation activity, compared with the other immunization strategy (p<0.05) | Reduced (p<0.01)<br>The most significant reduction of brain cyst burden was observed by the DNA prime-Ad boost approach. | Increased survival rate<br>67% Survival in mice vaccinated with p-UMAS prime and Ad-UMAS boost 28 days after challenge<br>Control mice were died within 8-10 days | Priming vaccination with DNA vaccine and boosting with the recombinant Ad vaccine encoding ubiquitin conjugated multi-stage antigens of <i>T. gondii</i> was proved to be a potential strategy against the infection of type I and type II parasite.                                      | [54]      |

↑, increase; Ad-UMAS, adenovirus expressing ubiquitin-conjugated multistage antigen segments; Ad, adenovirus; Ag, antigen; FCA, Freund's complete adjuvant; FIA, Freund's incomplete adjuvant; GRA, dense granule antigens; i.g, intragastrically; i.m, intramuscular; i.p, intraperitoneally; IFN-γ, interferon-γ; IL, interleukin; MAS, multi-stage antigen segments; MIC, microneme proteins; NR, not reported; ROP, rhoptry protein or rhoptry antigens; s.c, subcutaneous; SAG, surface antigens; *T. gondii*, *Toxoplasma gondii*; UMAS, ubiquitin-conjugated multistage antigen segments.
