# Supplementary material for: Rhoptry antigens as Toxoplasma gondii vaccine target
Source: PubMed Central journal article supplement — Clin Exp Vaccine Res. 2019 Jan 31;8(1):4–26. doi: 10.7774/cevr.2019.8.1.4 (PMC6369123; doi:10.7774/cevr.2019.8.1.4), 2019-01-31
Supplement: cevr-8-4-s008.pdf [file cevr-8-4-s008.pdf]

## References

1. Chen G, Guo H, Lu F, Zheng H. Construction of a recombinant plasmid harbouring the rhoptry protein 1 gene of *Toxoplasma gondii* and preliminary observations on DNA immunity. *Chin Med J (Engl)* 2001;114:837-40.
2. Guo H, Chen G, Lu F, Chen H, Zheng H. Immunity induced by DNA vaccine of plasmid encoding the rhoptry protein 1 gene combined with the genetic adjuvant of pcIFN-gamma against *Toxoplasma gondii* in mice. *Chin Med J (Engl)* 2001;114:317-20.
3. Quan JH, Chu JQ, Ismail HA, et al. Induction of protective immune responses by a multiantigenic DNA vaccine encoding GRA7 and ROP1 of *Toxoplasma gondii*. *Clin Vaccine Immunol* 2012;19:666-74.
4. Eslamirad Z, Dalimi A, Ghaffarifar F, Sharifi Z, Hosseini AZ. Induction of protective immunity against toxoplasmosis in mice by immunization with a plasmid encoding *Toxoplasma gondii* ROP1 gene. *Afr J Biotechnol* 2012;11:8735-41.
5. Sonaimuthu P, Ching XT, Fong MY, Kalyanasundaram R, Lau YL. Induction of protective immunity against toxoplasmosis in BALB/c mice vaccinated with *Toxoplasma gondii* rhoptry-1. *Front Microbiol* 2016;7:808.
6. Leyva R, Herion P, Saavedra R. Genetic immunization with plasmid DNA coding for the ROP2 protein of *Toxoplasma gondii*. *Parasitol Res* 2001;87:70-9.
7. Hoseinian Khosroshahi K, Ghaffarifar F, D'Souza S, Sharifi Z, Dalimi A. Evaluation of the immune response induced by DNA vaccine cocktail expressing complete SAG1 and ROP2 genes against toxoplasmosis. *Vaccine* 2011;29:778-83.
8. Zhang J, He S, Jiang H, et al. Evaluation of the immune response induced by multiantigenic DNA vaccine encoding SAG1 and ROP2 of *Toxoplasma gondii* and the adjuvant properties of murine interleukin-12 plasmid in BALB/c mice. *Parasitol Res* 2007;101:331-8.
9. Vercammen M, Scorza T, Huygen K, et al. DNA vaccination with genes encoding *Toxoplasma gondii* antigens GRA1, GRA7, and ROP2 induces partially protective immunity against lethal challenge in mice. *Infect Immun* 2000;68:38-45.
10. Chen J, Li ZY, Petersen E, Huang SY, Zhou DH, Zhu XQ. DNA vaccination with genes encoding *Toxoplasma gondii* antigens ROP5 and GRA15 induces protective immunity against toxoplasmosis in Kunming mice. *Expert Rev Vaccines* 2015;14:617-24.
11. Wang L, Lu G, Zhou A, et al. Evaluation of immune responses induced by rhoptry protein 5 and rhoptry protein 7 DNA vaccines against *Toxoplasma gondii*. *Parasite Immunol* 2016;38:209-17.
12. Parthasarathy S, Fong MY, Ramaswamy K, Lau YL. Protective immune response in BALB/c mice induced by DNA vaccine of the ROP8 gene of *Toxoplasma gondii*. *Am J Trop Med Hyg* 2013;88:883-7.
13. Chen J, Zhou DH, Li ZY, et al. *Toxoplasma gondii*: protective immunity induced by rhoptry protein 9 (TgROP9) against acute toxoplasmosis. *Exp Parasitol* 2014;139:42-8.
14. Wang PY, Yuan ZG, Petersen E, et al. Protective efficacy of a *Toxoplasma gondii* rhoptry protein 13 plasmid DNA vaccine in mice. *Clin Vaccine Immunol* 2012;19:1916-20.
15. Yuan ZG, Zhang XX, He XH, et al. Protective immunity induced by *Toxoplasma gondii* rhoptry protein 16 against toxoplasmosis in mice. *Clin Vaccine Immunol* 2011;18:119-24.
16. Liu Q, Wang F, Wang G, et al. *Toxoplasma gondii*: immune response and protective efficacy induced by ROP16/GRA7 multicomponent DNA vaccine with a genetic adjuvant B7-2. *Hum Vaccin Immunother* 2014;10:184-91.
17. Wang HL, Wang YJ, Pei YJ, et al. DNA vaccination with a gene encoding *Toxoplasma gondii* Rhoptry Protein 17 induces partial protective immunity against lethal challenge in mice. *Parasite* 2016;23:4.
18. Rashid I, Moire N, Heraut B, Dimier-Poisson I, Mevelec MN. Enhancement of the protective efficacy of a ROP18 vaccine against chronic toxoplasmosis by nasal route. *Med Microbiol Immunol* 2017;206:53-62.
19. Yuan ZG, Zhang XX, Lin RQ, et al. Protective effect against toxoplasmosis in mice induced by DNA immunization with gene encoding *Toxoplasma gondii* ROP18. *Vaccine* 2011;29:6614-9.
20. Qu D, Han J, Du A. Evaluation of protective effect of multiantigenic DNA vaccine encoding MIC3 and ROP18 antigen segments of *Toxoplasma gondii* in mice. *Parasitol Res* 2013;112:2593-9.
21. Zhou J, Wang L, Lu G, et al. Epitope analysis and protection by a ROP19 DNA vaccine against *Toxoplasma gondii*. *Parasite*

- 2016;23:17.
22. Xu Y, Zhang NZ, Tan QD, et al. Evaluation of immuno-efficacy of a novel DNA vaccine encoding *Toxoplasma gondii* rhoptry protein 38 (TgROP38) against chronic toxoplasmosis in a murine model. *BMC Infect Dis* 2014;14:525.
  23. Yang WB, Zhou DH, Zou Y, et al. Vaccination with a DNA vaccine encoding *Toxoplasma gondii* ROP54 induces protective immunity against toxoplasmosis in mice. *Acta Trop* 2017;176:427-32.
  24. Chen H, Chen G, Zheng H, Guo H. Induction of immune responses in mice by vaccination with Liposome-entrapped DNA complexes encoding *Toxoplasma gondii* SAG1 and ROP1 genes. *Chin Med J (Engl)* 2003;116:1561-6.
  25. Fachado A, Rodriguez A, Angel SO, et al. Protective effect of a naked DNA vaccine cocktail against lethal toxoplasmosis in mice. *Vaccine* 2003;21:1327-35.
  26. Xue M, He S, Cui Y, Yao Y, Wang H. Evaluation of the immune response elicited by multi-antigenic DNA vaccine expressing SAG1, ROP2 and GRA2 against *Toxoplasma gondii*. *Parasitol Int* 2008;57:424-9.
  27. Khosroshahi KH, Ghaffarifar F, Sharifi Z, et al. Comparing the effect of IL-12 genetic adjuvant and alum non-genetic adjuvant on the efficiency of the cocktail DNA vaccine containing plasmids encoding SAG-1 and ROP-2 of *Toxoplasma gondii*. *Parasitol Res* 2012;111:403-11.
  28. Naserifar R, Ghaffarifar F, Dalimi A, Sharifi Z, Solhjoo K, Hosseinian Khosroshahi K. Evaluation of immunogenicity of cocktail DNA vaccine containing plasmids encoding complete GRA5, SAG1, and ROP2 antigens of *Toxoplasma gondii* in BALB/C mice. *Iran J Parasitol* 2015;10:590-8.
  29. Xue M, He S, Zhang J, Cui Y, Yao Y, Wang H. Comparison of cholera toxin A2/B and murine interleukin-12 as adjuvants of *Toxoplasma* multi-antigenic SAG1-ROP2 DNA vaccine. *Exp Parasitol* 2008;119:352-7.
  30. Cui YL, He SY, Xue MF, Zhang J, Wang HX, Yao Y. Protective effect of a multiantigenic DNA vaccine against *Toxoplasma gondii* with co-delivery of IL-12 in mice. *Parasite Immunol* 2008;30:309-13.
  31. Jongert E, de Craeye S, Dewit J, Huygen K. GRA7 provides protective immunity in cocktail DNA vaccines against *Toxoplasma gondii*. *Parasite Immunol* 2007;29:445-53.
  32. Martin V, Supanitsky A, Echeverria PC, et al. Recombinant GRA4 or ROP2 protein combined with alum or the gra4 gene provides partial protection in chronic murine models of toxoplasmosis. *Clin Diagn Lab Immunol* 2004;11:704-10.
  33. Sanchez VR, Pitkowski MN, Fernandez Cuppari AV, et al. Combination of CpG-oligodeoxynucleotides with recombinant ROP2 or GRA4 proteins induces protective immunity against *Toxoplasma gondii* infection. *Exp Parasitol* 2011;128:448-53.
  34. Igarashi M, Zulpo DL, Cunha IA, et al. *Toxoplasma gondii*: humoral and cellular immune response of BALB/c mice immunized via intranasal route with rTgROP2. *Rev Bras Parasitol Vet* 2010;19:210-6.
  35. Zheng B, Lu S, Tong Q, Kong Q, Lou D. The virulence-related rhoptry protein 5 (ROP5) of *Toxoplasma Gondii* is a novel vaccine candidate against toxoplasmosis in mice. *Vaccine* 2013;31:4578-84.
  36. Wang HL, Zhang TE, Yin LT, et al. Partial protective effect of intranasal immunization with recombinant *Toxoplasma gondii* rhoptry protein 17 against toxoplasmosis in mice. *PLoS One* 2014;9:e108377.
  37. Qu D, Han J, Du A. Enhancement of protective immune response to recombinant *Toxoplasma gondii* ROP18 antigen by ginsenoside Re. *Exp Parasitol* 2013;135:234-9.
  38. Nabi H, Rashid I, Ahmad N, et al. Induction of specific humoral immune response in mice immunized with ROP18 nanoparticles from *Toxoplasma gondii*. *Parasitol Res* 2017;116:359-70.
  39. Echeverria PC, de Miguel N, Costas M, Angel SO. Potent antigen-specific immunity to *Toxoplasma gondii* in adjuvant-free vaccination system using Rop2-Leishmania infantum Hsp83 fusion protein. *Vaccine* 2006;24:4102-10.
  40. Dziadek B, Gatkowska J, Brzostek A, et al. Evaluation of three recombinant multi-antigenic vaccines composed of surface and secretory antigens of *Toxoplasma gondii* in murine models of experimental toxoplasmosis. *Vaccine* 2011;29:821-30.
  41. Dziadek B, Gatkowska J, Grzybowski M, Dziadek J, Dzitko K, Dlugonska H. *Toxoplasma gondii*: the vaccine potential of three trivalent antigen-cocktails composed of recombinant ROP2, ROP4, GRA4 and SAG1 proteins against chronic toxoplasmosis in BALB/c mice. *Exp Parasitol* 2012;131:133-8.
  42. Dziadek B, Gatkowska J, Brzostek A, Dziadek J, Dzitko K, Dlugonska H. *Toxoplasma gondii*: the immunogenic and protective efficacy of recombinant ROP2 and ROP4 rhoptry proteins in murine experimental toxoplasmosis. *Exp Parasitol* 2009;

123:81-9.

43. Igarashi M, Kano F, Tamekuni K, et al. *Toxoplasma gondii*: evaluation of an intranasal vaccine using recombinant proteins against brain cyst formation in BALB/c mice. *Exp Parasitol* 2008;118:386-92.
44. Grzybowski MM, Dziadek B, Gatkowska JM, Dzitko K, Dlugonska H. Towards vaccine against toxoplasmosis: evaluation of the immunogenic and protective activity of recombinant ROP5 and ROP18 *Toxoplasma gondii* proteins. *Parasitol Res* 2015;114:4553-63.
45. Xu Y, Zhang NZ, Wang M, et al. A long-lasting protective immunity against chronic toxoplasmosis in mice induced by recombinant rhoptry proteins encapsulated in poly (lactide-co-glycolide) microparticles. *Parasitol Res* 2015;114:4195-203.
46. Zhang NZ, Xu Y, Wang M, et al. Vaccination with *Toxoplasma gondii* calcium-dependent protein kinase 6 and rhoptry protein 18 encapsulated in poly(lactide-co-glycolide) microspheres induces long-term protective immunity in mice. *BMC Infect Dis* 2016;16:168.
47. Cong H, Gu QM, Yin HE, et al. Multi-epitope DNA vaccine linked to the A2/B subunit of cholera toxin protect mice against *Toxoplasma gondii*. *Vaccine* 2008;26:3913-21.
48. Cao A, Liu Y, Wang J, et al. *Toxoplasma gondii*: Vaccination with a DNA vaccine encoding T- and B-cell epitopes of SAG1, GRA2, GRA7 and ROP16 elicits protection against acute toxoplasmosis in mice. *Vaccine* 2015;33:6757-62.
49. Roque-Resendiz JL, Rosales R, Herion P. MVA ROP2 vaccinia virus recombinant as a vaccine candidate for toxoplasmosis. *Parasitology* 2004;128:397-405.
50. Wang H, Liu Q, Liu K, et al. Immune response induced by recombinant *Mycobacterium bovis* BCG expressing ROP2 gene of *Toxoplasma gondii*. *Parasitol Int* 2007;56:263-8.
51. Cong H, Yuan Q, Zhao Q, et al. Comparative efficacy of a multi-epitope DNA vaccine via intranasal, peroral, and intramuscular delivery against lethal *Toxoplasma gondii* infection in mice. *Parasit Vectors* 2014;7:145.
52. Li XZ, Lv L, Zhang X, et al. Recombinant canine adenovirus type-2 expressing TgROP16 provides partial protection against acute *Toxoplasma gondii* infection in mice. *Infect Genet Evol* 2016;45:447-53.
53. Li XZ, Wang XH, Xia LJ, et al. Protective efficacy of recombinant canine adenovirus type-2 expressing TgROP18 (CAV-2-ROP18) against acute and chronic *Toxoplasma gondii* infection in mice. *BMC Infect Dis* 2015;15:114.
54. Yin H, Zhao L, Wang T, Zhou H, He S, Cong H. A *Toxoplasma gondii* vaccine encoding multistage antigens in conjunction with ubiquitin confers protective immunity to BALB/c mice against parasite infection. *Parasit Vectors* 2015;8:498.
55. Wang T, Yin H, Li Y, Zhao L, Sun X, Cong H. Vaccination with recombinant adenovirus expressing multi-stage antigens of *Toxoplasma gondii* by the mucosal route induces higher systemic cellular and local mucosal immune responses than with other vaccination routes. *Parasite* 2017;24:12.
56. Li WS, Chen QX, Ye JX, Xie ZX, Chen J, Zhang LF. Comparative evaluation of immunization with recombinant protein and plasmid DNA vaccines of fusion antigen ROP2 and SAG1 from *Toxoplasma gondii* in mice: cellular and humoral immune responses. *Parasitol Res* 2011;109:637-44.
